# Supplementary material
Source: PubMed Central journal article supplement (PMC7195022)
Supplement: NIHMS1570579-supplement-Code.pdf [file NIHMS1570579-supplement-Code.pdf]

1The code is available at <https://github.com/twoertwein/UncertaintyRegression>
